# Supplementary material for: Differential Regulation of Strand-Specific Transcripts from Arabidopsis Centromeric Satellite Repeats
Source: PLOS journal article supplement (doi:10.1371/journal.pgen.0010079), 2005-12-15
Supplement: S1 (10.1371/journal.pgen.0010079.s001) [file journal.pgen.0010079.s001]

**Supplementary Information.**

**Primer sequences.** The same oligonucleotide primers were used for RT-PCR, ChIP and probe amplification. Sequences were as follows:

cen180 F: ACCATCAAAGCCTTGAGAAGCA

cen180 R: CCGTATGAGTCTTTGTCTTTGTATCTTCT

cen180 Fc: GGTTAGTGTTTTGGAGTCGAATATG

cen180 Rc: TTGCTTCTCAAAGATTTCATGGT

106B F: TTGATTGATAGATCCCTTCTGGA

106B R: CGAGGATGGGGTAATTGAGT

106B F out: CGAAACTACTCAATTACCTCATCC

106B R out: TCCAGAAGGGATCTATCAATCAA

cen180 dcl probe (Landsberg): TTAGGCTTTTAAGAGCGCGT

cen180 met probe (Landsberg): TTTAGCTTTTGGGAACTGGT

cen180 dcl probe (Columbia): TTAGGCTTATAAGATGCAGTT

cen180 met probe (Columbia): TTACGCGTATAAGATCCGATT
